# Supplementary material for: Regulatory activity based risk model identifies survival of stage II and III colorectal carcinoma
Source: PubMed Central journal article supplement (PMC5716735; doi:10.18632/oncotarget.21312), 2017-09-28
Supplement: oncotarget-08-98360-s001.pdf [file oncotarget-08-98360-s001.pdf]

# Regulatory activity based risk model identifies survival of stage II and III colorectal carcinoma

## SUPPLEMENTARY MATERIALS

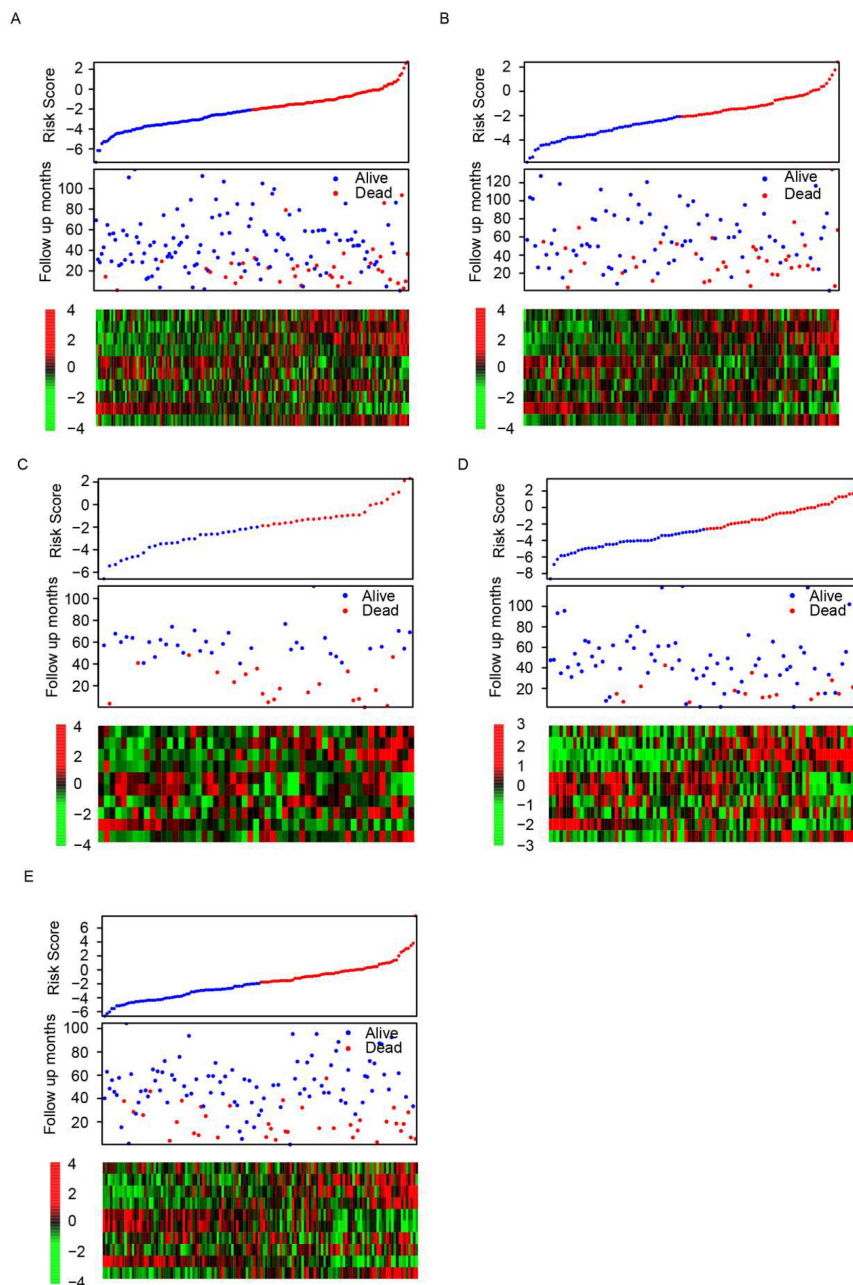

**Supplementary Figure 1:** The detailed survival information and transcription activity of candidates in five independent datasets (A) GSE14333, (B) GSE17536, (C) GSE17537, (D) GSE33113, (E) GSE37892).
